# Supplementary material for: Maternal Diet Supplemented with Methyl-Donors Protects against Atherosclerosis in F1 ApoE−/− Mice
Source: PubMed Central journal article supplement (PMC3578836; doi:10.1371/journal.pone.0056253), 2013-02-21
Supplement: pone.0056253.s003.pdf [file pone.0056253.s003.pdf]

**Table S1: Diet composition<sup>1,2</sup>**

| <b>Ingredient</b>                          | <b>Control</b> | <b>MS</b> |
|--------------------------------------------|----------------|-----------|
| <b><i>Amino Acids, g/kg</i></b>            |                |           |
| L-Alanine                                  | 4.02           | 4.02      |
| L-Arginine HCl                             | 13.9           | 13.9      |
| L-Asparagine                               | 6.90           | 6.90      |
| L-Aspartic Acid                            | 4.02           | 4.02      |
| L-Cystine                                  | 2.50           | 2.50      |
| L-Glutamic Acid                            | 46.0           | 46.0      |
| Glycine                                    | 26.8           | 26.8      |
| L-Histidine HCl, monohydrate               | 5.17           | 5.17      |
| L-Isoleucine                               | 9.43           | 9.43      |
| L-leucine                                  | 12.8           | 12.8      |
| L-Lysine HCl                               | 20.7           | 20.7      |
| *L-Methionine                              | 4.30           | 11.8      |
| L-Phenylalanine                            | 8.63           | 8.63      |
| L-Proline                                  | 4.02           | 4.02      |
| L-Serine                                   | 4.02           | 4.02      |
| L-Threonine                                | 9.40           | 9.40      |
| L-Tryptophan                               | 2.07           | 2.07      |
| L-Tyrosine                                 | 5.75           | 5.75      |
| L-Valine                                   | 9.43           | 9.43      |
| <b><i>Carbohydrates, g/kg</i></b>          |                |           |
| Sucrose                                    | 350            | 350       |
| Corn Starch                                | 150            | 150       |
| Maltodextrin, Lo-Dex 10                    | 150            | 150       |
| Cellulose (Solka Floc)-non-Nutritive Fiber | 30.0           | 30.0      |
| <b><i>Vitamins, mg/kg</i></b>              |                |           |
| Niacin (Vit B3)                            | 45.0           | 45.0      |
| Calcium pantothenate (Vit B5)              | 24.0           | 24.0      |
| Pyridoxine HCL (Vit B6)                    | 10.5           | 10.5      |
| Thiamine HCL (Vit B1)                      | 9.00           | 9.00      |
| Riboflavin (Vit B2)                        | 9.00           | 9.00      |
| *Folic acid (Vit B9)                       | 3.00           | 13.5      |
| Biotin (Vit B7)                            | 0.30           | 0.30      |
| *Cobalamin (Vit B12) (0.1% in mannitol)    | 62.5           | 1560      |
| A-tocopherol (Vit E) (500 IU/g)            | 225            | 225       |
| Retinyl palmitate (Vit A) (500,000 IU/g)   | 12.0           | 12.0      |
| Cholecalciferol (Vit D3) (500,000 IU/g)    | 3.00           | 3.00      |
| Phylloquinone (Vit K1)                     | 1.12           | 1.12      |

**Table S1: Diet composition continue<sup>1,2...</sup>**

| <b>Ingredient</b>                                                                         | <b>Control</b> | <b>MS</b> |
|-------------------------------------------------------------------------------------------|----------------|-----------|
| <b>Salts and minerals, g/kg</b>                                                           |                |           |
| Ca(H <sub>2</sub> PO <sub>4</sub> ) <sub>2</sub> ·H <sub>2</sub> O                        | 8.20           | 8.20      |
| CaCO <sub>3</sub>                                                                         | 13.5           | 13.5      |
| MgO                                                                                       | 1.95           | 1.95      |
| CuCO <sub>3</sub>                                                                         | 25.7           | 25.7      |
| FeSO <sub>4</sub> ·7H <sub>2</sub> O,                                                     | 0.21           | 0.21      |
| Na <sub>2</sub> SeO <sub>3</sub> (0.044% in sucrose)                                      | 1.25           | 1.25      |
| *ZnSO <sub>4</sub> ·7H <sub>2</sub> O                                                     | 0              | 0.72      |
| ZnCO <sub>3</sub>                                                                         | 0.058          | 0.058     |
| KH <sub>2</sub> PO <sub>4</sub>                                                           | 8.75           | 8.75      |
| Potassium Citrate                                                                         | 0.98           | 0.98      |
| NaCl                                                                                      | 2.59           | 2.5       |
| K <sub>2</sub> SO <sub>4</sub>                                                            | 1.63           | 1.63      |
| Ferric Citrate                                                                            | 0.212          | 0.212     |
| MnCO <sub>3</sub>                                                                         | 0.022          | 0.022     |
| KIO <sub>3</sub> , mg/kg                                                                  | 0.00035        | 0.00035   |
| Na <sub>2</sub> SeO <sub>4</sub> , mg/kg                                                  | 0.00036        | 0.00036   |
| (NH <sub>4</sub> ) <sub>6</sub> Mo <sub>7</sub> O <sub>24</sub> ·4H <sub>2</sub> O, mg/kg | 0.00028        | 0.00028   |
| Na <sub>2</sub> SiO <sub>3</sub> ·9H <sub>2</sub> O, mg/kg                                | 0.0508         | 0.0508    |
| LiCl, mg/kg                                                                               | 0.00061        | 0.00061   |
| Boric Acid, mg/kg                                                                         | 0.0028         | 0.0028    |
| NaF, mg/kg                                                                                | 0.0022         | 0.0022    |
| NH <sub>4</sub> VO <sub>3</sub> , mg/kg                                                   | 0.00023        | 0.00023   |
| 2NiCO <sub>3</sub> ·3Ni(OH) <sub>2</sub> ·4H <sub>2</sub> O, mg/kg                        | 0.00011        | 0.00011   |
| <b>Others, g/kg</b>                                                                       |                |           |
| Soybean Oil                                                                               | 80.0           | 80.0      |
| *Betaine, anhydrous                                                                       | 0              | 0.015     |
| *Choline Chloride                                                                         | 1.35           | 19.4      |
| TBHQ, antioxidant                                                                         | 0.02           | 0.02      |
| <b>Total energy, (% cal)</b>                                                              |                |           |
| Protein                                                                                   | 17.6           | 18.8      |
| Carbohydrate                                                                              | 64.0           | 62.1      |
| Fat                                                                                       | 18.4           | 19.1      |

<sup>1</sup>Diets are modifications of TD.99366.

<sup>2</sup>Diet ingredient concentrations are presented to 3 significant digits. More precisely defined concentrations are available from Harlan Teklad.

\* Denote the ingredients that were significantly different between MS and control TD diet.
